# Supplementary material for: A BC2N/blue phosphorene heterostructure as an anode material for high-performance sodium-ion batteries: first principles insights
Source: Royal Society of Chemistry journal article supplement (doi:10.1039/d2cp04104a), 2023-01-01
Supplement: d2cp04104a1.pdf [file d2cp04104a1.pdf]

## Supporting information

### **BC<sub>2</sub>N/Blue Phosphorene Heterostructure as an Anode Material for High-Performance Sodium-Ion Batteries: First Principles Insights**

Zouhir Mansouri<sup>1,2,3\*</sup>, Ahmed Al-Shami<sup>1,2,4</sup>, Anass Sibari<sup>5</sup>, Salma Lahbabi<sup>2,6</sup>, Abdallah El Kenz<sup>1</sup>, Abdelilah Benyoussef<sup>1</sup>, Abdelouahed El Fatimy<sup>3</sup> and Omar Mounkachi<sup>1,2,3\*</sup>

<sup>1</sup>Laboratoire de Matière Condensée et Sciences Interdisciplinaires (LaMCScI), Faculty of Science, Mohammed V University in Rabat, Rabat 1014, Morocco

<sup>2</sup>MSDA, Mohammed VI Polytechnic University, Lot 660, Hay Moulay Rachid Ben Guerir, 43150, Morocco

<sup>3</sup>Institute of Applied Physics, Mohammed VI Polytechnic University, Lot 660, Hay Moulay Rachid Ben Guerir, 43150, Morocco.

<sup>4</sup>Department of Physics, Faculty of Science, Sana'a University, Sana'a, Yemen

<sup>5</sup>Supramolecular Nanomaterials Group (SNG), Mohammed VI Polytechnic University, Benguerir 43150, Morocco

<sup>6</sup>Equipe Modélisation, Applications, Mathématiques et Informatiques (EMAMI), Laboratoire de Recherche en Ingénierie, ENSEM, Hassan II Université of Casablanca, Casablanca 20000, Morocco

\*Corresponding author:

E-mail address: [zouhirmansouri.2016@gmail.com](mailto:zouhirmansouri.2016@gmail.com); [o.mounkachi@fsr.um5.ac.ma](mailto:o.mounkachi@fsr.um5.ac.ma)

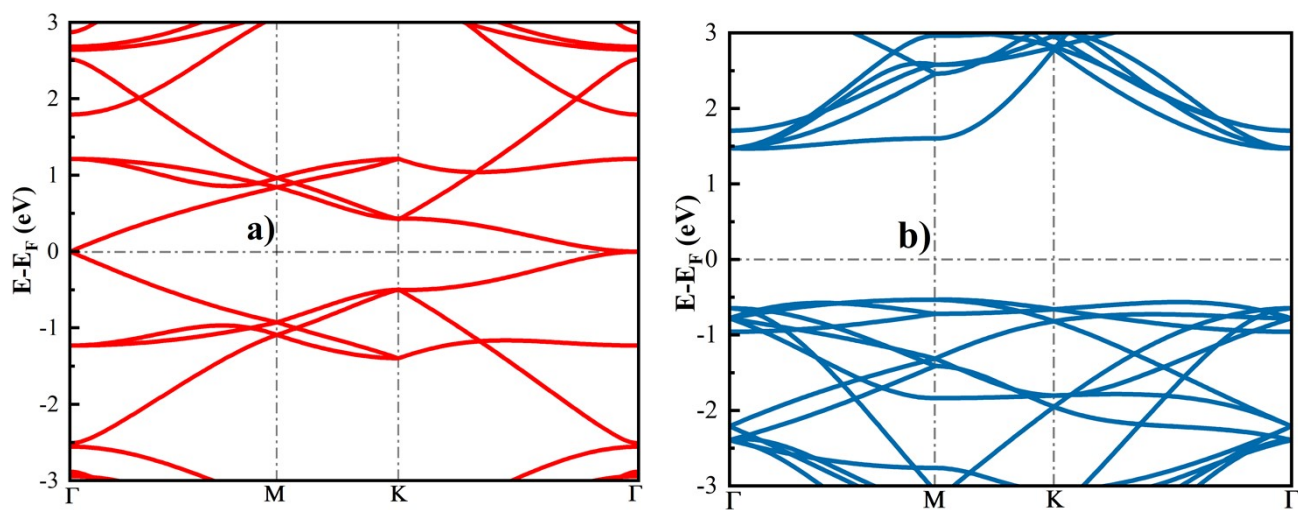

**Figure S1.** Calculated projected band-structure curves of the (a) pristine  $\text{BC}_2\text{N}$  sheet, (b) pristine Blu-Pn layer. The Fermi energy is set to zero eV, and indicated by a dash-dotted line.

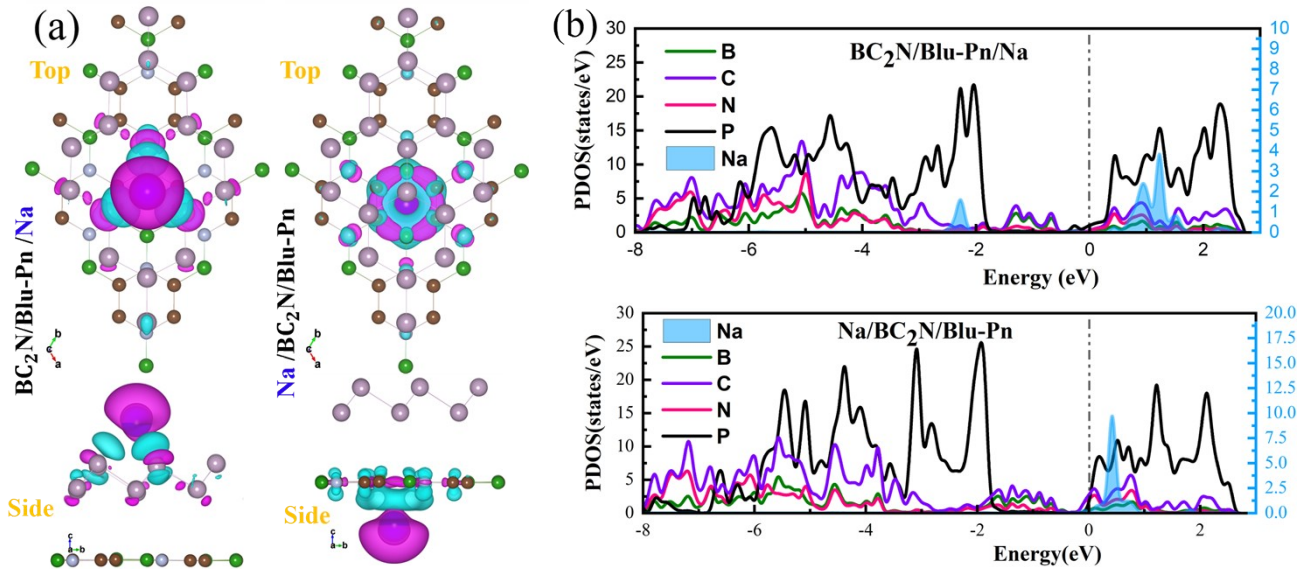

**Figure S2.** (a) Charge density difference plots of Na adsorption at the most preferable site in the outer-surfaces of Blu-Pn ( $V_{Pn}$ -site) and  $BC_2N$  ( $H_{BC}$ ). (b) The Corresponding computed orbital-projected DOS curves. The cyan and magenta colors indicate the charge depletion and accumulation, respectively. The isosurfaces value is taken to be  $1.5 \times 10^{-3} e/\text{\AA}^3$ , and the Fermi level is set to 0 eV.
